# Supplementary material for: The mosquito electrocuting trap as an exposure-free method for measuring human-biting rates by Aedes mosquito vectors
Source: PubMed Central journal article supplement (PMC6961254; doi:10.1186/s13071-020-3887-8), 2020-01-15
Supplement: 13071_2020_3887_MOESM2_ESM.pdf [file 13071_2020_3887_MOESM2_ESM.pdf]

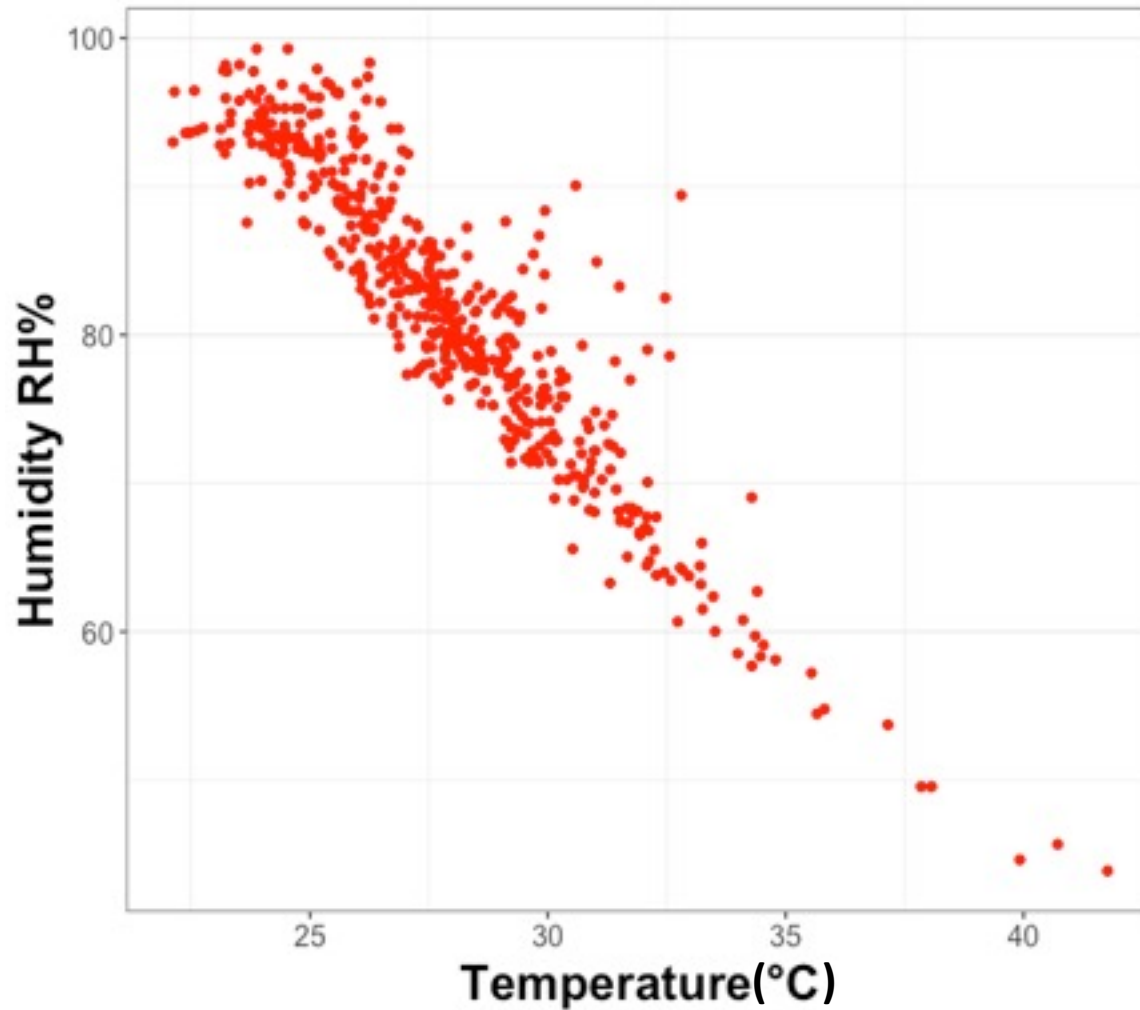

**Figure S1.** Relationship between observed temperature ( $^{\circ}\text{C}$ ) and relative humidity (%). Red dots represent individual observations per hour recorded.
