# Supplementary material for: The mosquito electrocuting trap as an exposure-free method for measuring human-biting rates by Aedes mosquito vectors
Source: PubMed Central journal article supplement (PMC6961254; doi:10.1186/s13071-020-3887-8), 2020-01-15
Supplement: 13071_2020_3887_MOESM3_ESM.pdf [file 13071_2020_3887_MOESM3_ESM.pdf]

PCR S7 (expected size 290 bp)

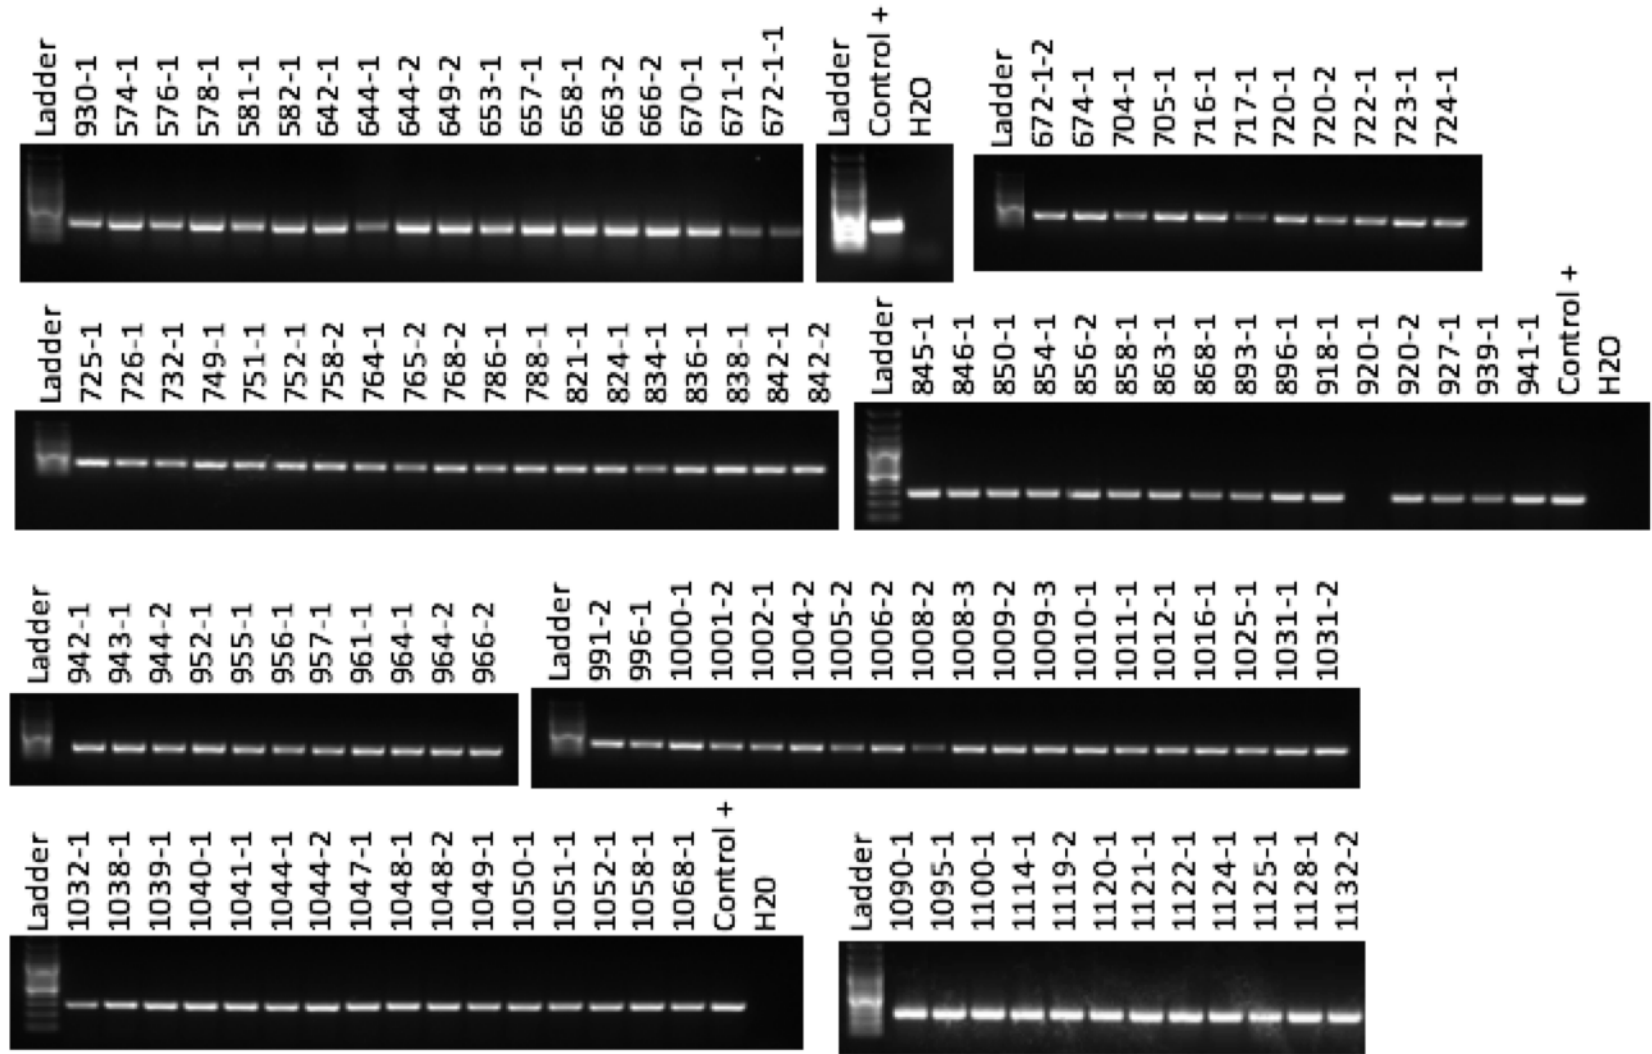

**Figure S2.** Visualization of the PCR products of S7 gene on agarose gels. All samples were positive, except 920-1.
